# Supplementary material for: Relationship between Hormonal Modulation and Gastroprotective Activity of Malvidin and Cyanidin Chloride: In Vivo and In Silico Approach
Source: MDPI journal article supplement (doi:10.3390/pharmaceutics14030565), 2022-03-04
Supplement: s1 [file s1]

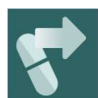

**Table S1.** Effect of oral treatment with malvidin or cyanidin chloride in the prevention of gastric lesions induced by ethanol (results presented as mean  $\pm$  standard error of the mean).

| Experimental Group                        | Treatment (p.o.) | Dose (mg/kg) | Lesion Area (mm <sup>2</sup> ) | MPO (Unit of MPO/g) | GSH (nmol/g)       | CAT (Unit of CAT/g) | SOD (Unit of SOD/g) |
|-------------------------------------------|------------------|--------------|--------------------------------|---------------------|--------------------|---------------------|---------------------|
| Males                                     | Vehicle          | -            | 278.1 $\pm$ 68.9               | 39.2 $\pm$ 3.7      | 715.2 $\pm$ 64.3   | 37.64 $\pm$ 4.2     | 16.96 $\pm$ 2.5     |
|                                           | Lansoprazole     | 30           | 50.69 $\pm$ 25.8**             | 14.86 $\pm$ 1.3**   | 1016.0 $\pm$ 86.1* | 62.18 $\pm$ 6.3**   | 23.24 $\pm$ 3.5     |
|                                           |                  | 2.5          | 199.1 $\pm$ 78.3               | 26.77 $\pm$ 2.8     | -                  | -                   | -                   |
|                                           | Malvidin         | 5            | 25.31 $\pm$ 8.7**              | 16.26 $\pm$ 2.3*    | 627.5 $\pm$ 77.7   | 48.33 $\pm$ 4.2     | 11.27 $\pm$ 1.7     |
|                                           |                  | 10           | 70.26 $\pm$ 57.5*              | 36.27 $\pm$ 13.7    | -                  | -                   | -                   |
|                                           | Cyanidin         | 5            | 71.16 $\pm$ 33.9*              | 19.29 $\pm$ 4.2*    | 811.2 $\pm$ 32.4   | 58.92 $\pm$ 5.4**   | 8.51 $\pm$ 1.3      |
|                                           |                  | 10           | 49.81 $\pm$ 18.8**             | 21.56 $\pm$ 5.1     | -                  | -                   | -                   |
|                                           |                  | 20           | 48.33 $\pm$ 4.8**              | 15.77 $\pm$ 3.9*    | -                  | -                   | -                   |
|                                           | Not treated      | -            | -                              | 16.8 $\pm$ 1.6**    | 1156.0 $\pm$ 85.5* | 57.0 $\pm$ 1.4*     | 28.33 $\pm$ 2.8*    |
|                                           |                  |              |                                |                     |                    |                     |                     |
| Females - ovariectomized and supplemented | Vehicle          | -            | 235.2 $\pm$ 55.6               | 19.17 $\pm$ 1.9     | 72.48 $\pm$ 6.7    | 61.02 $\pm$ 5.9     | 5.49 $\pm$ 0.5      |
|                                           | Lansoprazole     | 30           | 75.99 $\pm$ 14.4*              | 12.07 $\pm$ 0.2**   | 120.1 $\pm$ 8.7**  | 87.86 $\pm$ 13.9    | 7.12 $\pm$ 1.6      |
|                                           |                  | 2.5          | 93.27 $\pm$ 35.6               | 14.07 $\pm$ 1.2     | -                  | -                   | -                   |
|                                           | Malvidin         | 5            | 21.51 $\pm$ 8.8*               | 11.95 $\pm$ 0.4**   | 98.18 $\pm$ 13.4   | 67.16 $\pm$ 10.7    | 5.53 $\pm$ 1.2      |
|                                           |                  | 10           | 209.1 $\pm$ 70.6               | 16.21 $\pm$ 1.4     | -                  | -                   | -                   |
|                                           | Cyanidin         | 5            | 162.0 $\pm$ 78.4               | 14.62 $\pm$ 1.7     | -                  | -                   | -                   |
|                                           |                  | 10           | 132.9 $\pm$ 29.8               | 15.19 $\pm$ 1.2     | -                  | -                   | -                   |
|                                           |                  | 20           | 45.37 $\pm$ 19.9*              | 12.36 $\pm$ 0.8**   | 109.3 $\pm$ 9.9*   | 63.10 $\pm$ 4.5     | 7.0 $\pm$ 0.9       |
|                                           | Not treated      | -            | -                              | 10.84 $\pm$ 0.7***  | 103.9 $\pm$ 3.8    | 90.15 $\pm$ 26.9    | 7.4 $\pm$ 1.4       |
|                                           |                  |              |                                |                     |                    |                     |                     |
| Females - ovariectomized                  | Vehicle          | -            | 129.1 $\pm$ 44.3               | 16.98 $\pm$ 1.4     | 69.01 $\pm$ 11.4   | 60.48 $\pm$ 10.9    | 5.45 $\pm$ 1.3      |
|                                           | Lansoprazole     | 30           | 38.28 $\pm$ 15.8               | 11.04 $\pm$ 0.7     | 89.1 $\pm$ 12.8    | 75.20 $\pm$ 8.8     | 8.4 $\pm$ 0.7       |
|                                           |                  | 2.5          | 285.6 $\pm$ 124.1              | 13.28 $\pm$ 1.6     | -                  | -                   | -                   |
|                                           | Malvidin         | 5            | 48.63 $\pm$ 12.4               | 9.24 $\pm$ 1.7**    | 128.2 $\pm$ 10.1*  | 58.10 $\pm$ 5.1     | 11.06 $\pm$ 1.6*    |
|                                           |                  | 10           | 443.5 $\pm$ 111.7              | 16.53 $\pm$ 2.3     | -                  | -                   | -                   |
|                                           | Cyanidin         | 5            | 218.8 $\pm$ 109.2              | 9.1 $\pm$ 2.1**     | -                  | -                   | -                   |
|                                           |                  | 10           | 18.8 $\pm$ 11.1                | 10.62 $\pm$ 0.5     | 116.0 $\pm$ 18.7   | 74.96 $\pm$ 11.2    | 5.92 $\pm$ 1.2      |
|                                           |                  | 20           | 61.35 $\pm$ 29.4               | 12.07 $\pm$ 1.3     | -                  | -                   | -                   |
|                                           | Not treated      | -            | -                              | 11.88 $\pm$ 0.4     | 92.67 $\pm$ 2.9    | 108.1 $\pm$ 10.9*   | 7.77 $\pm$ 0.9      |
|                                           |                  |              |                                |                     |                    |                     |                     |

Data are presented as mean  $\pm$  S.E.M. ANOVA followed by the Dunnett's test; where \*  $p < 0.05$  and \*\*  $p < 0.01$ , compared to the respective vehicle group.

### 1. Hormonal blockade by surgical method

To investigate the effect of ovariectomization in female mice was realized the quantification of estradiol in plasma samples through the radioimmunoassay. We collected samples by cardiac puncture from ovariectomized females (OVX) and intact animals, that did not pass by a surgical process. We can observe that estradiol levels of intact animals are higher, when compared to the ovariectomized group (OVX), showing that the surgical procedure was capable to reduce the circulating levels of estradiol (see in Figure S1).

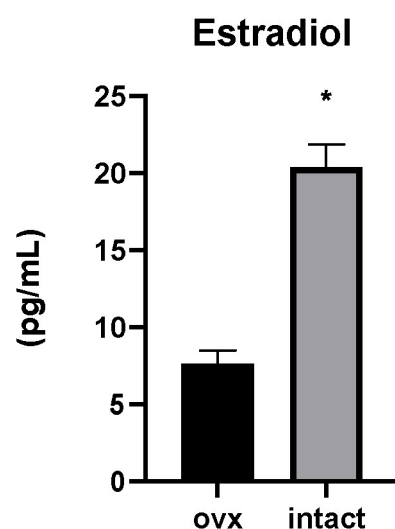

**Figure S1.** Plasma concentrations of estradiol quantified by radioimmune assay of ovariectomized and intact females. We can observe that intact animals have a higher concentration of total estradiol, when compared to the ovariectomized (OVX) females. Data are presented as mean  $\pm$  S.E.M. ANOVA followed by the Dunnett's test; where \*  $p < 0.05$ , compared to the respective vehicle group.

## 2. Vaginal smear

The vaginal smear was done according to procedure of [1], in the day of gastric ulcer induced by absolute ethanol, we analyze the vaginal washed content of females. The samples were inserted in glass slides and analyzed using an optical microscope in the magnification of 400x. In the vaginal smear, we can observe that ovariectomization implicated in the absence of epithelial cells (superficial and intermediate) (see in Figure S2a), but we can observe the presence of bacilli, that are common microbiota present in the vaginal region. In the OVX females followed by hormonal supplementation with 17- $\beta$ -estradiol the results indicate a cellular profile found in the normal vaginal mucosa, i.e., superficial cells suggesting the estrogenic phase (small nuclei) and intermediate cells where the nuclei are large (see in Figure S2b). In the intact females we analyze 4 animals and was possibly to note that each female was in a different phase of estrous cycle. Animals 1 and 2 has a large amount of superficial and a minor number of intermediate cells, but the animal number 3 and 4 have total absence of cells, such as the OVX females (see in Figure S2c). Based in this significant variation of estrous phase, we decide to use 17- $\beta$ -estradiol as a pharmacological tool to normalize the hormonal levels and avoid the interference in the anthocyanidin treatment [2,3].

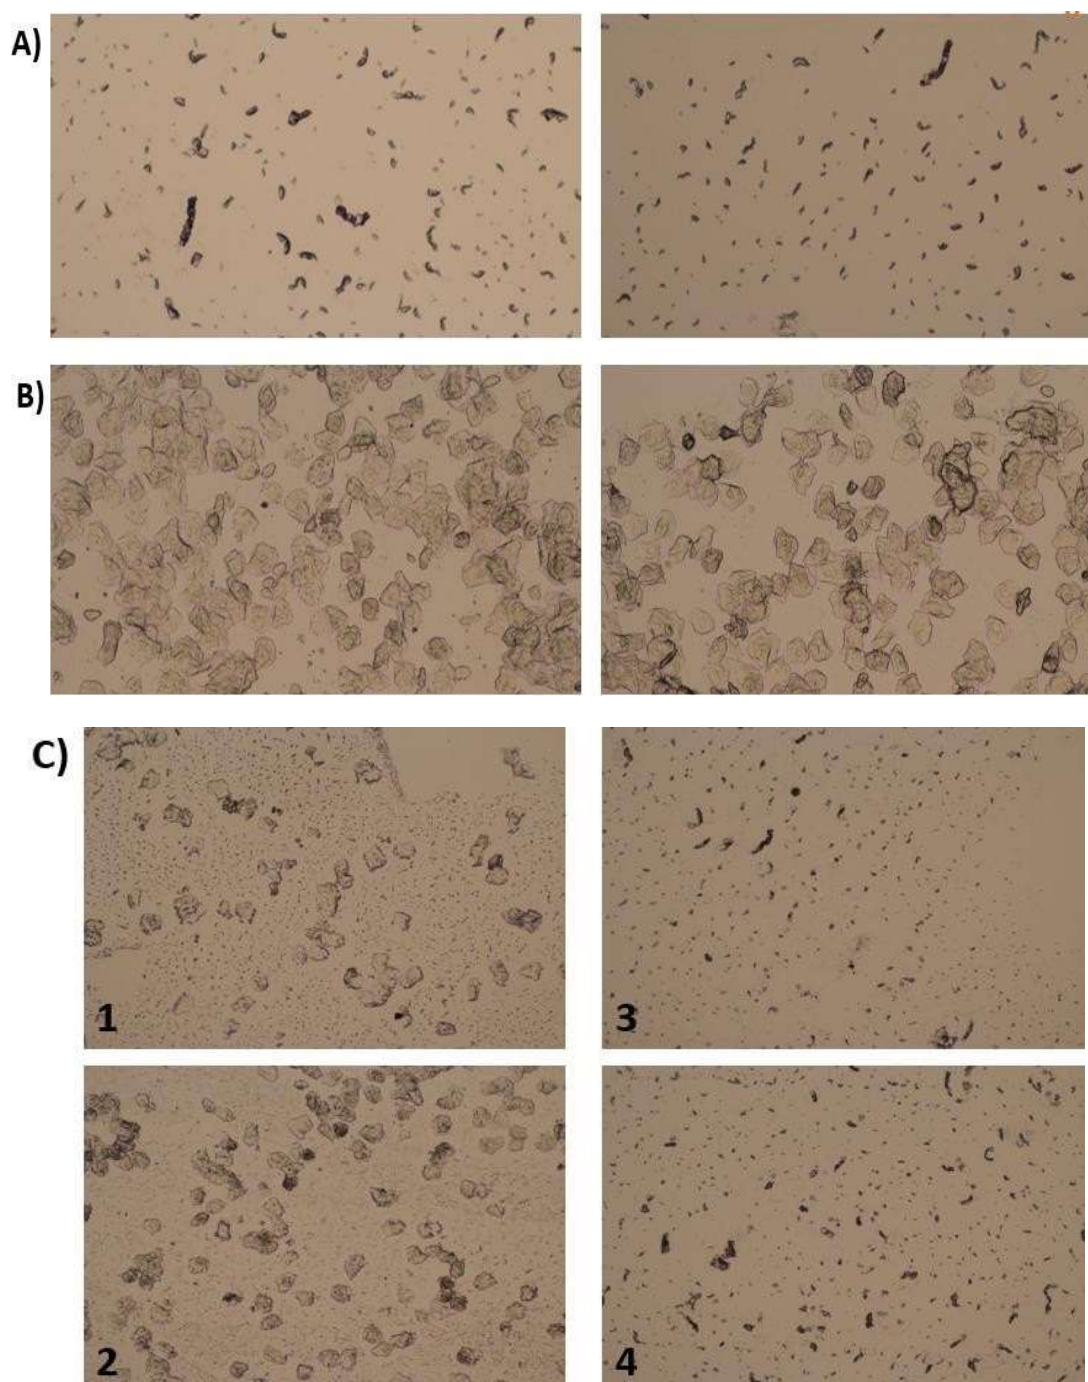

**Figure S2.** Vaginal smear realized in the animals submitted to ethanol induced gastric ulcer realized in the 29th day of experimental calendar (A) groups of female animals ovariectomized and not supplemented (B) group of females ovariectomized and supplement with 17- $\beta$ -estradiol (C) intact females. Magnification of 400x.

**Table S2.** Prediction of ADMET properties by pkCSM server for the molecules Lansoprazole, Malvidin and Cyanidin.

| Property            | Model Name                        | Predicted Value-Lansoprazole | Predicted Value-Malvidin | Predicted Value-Cyanidin | Unit                                        |
|---------------------|-----------------------------------|------------------------------|--------------------------|--------------------------|---------------------------------------------|
| <b>Absorption</b>   | Water solubility                  | −2.767                       | −3.557                   | −3.129                   | Numeric (log mol/L)                         |
| <b>Absorption</b>   | Caco2 permeability                | 1.055                        | −0.088                   | −0.357                   | Numeric (log Papp in 10 <sup>−6</sup> cm/s) |
| <b>Absorption</b>   | Intestinal absorption (human)     | 84                           | 59.362                   | 67.885                   | Numeric (% Absorbed)                        |
| <b>Absorption</b>   | Skin Permeability                 | −2.735                       | −2.735                   | −2.735                   | Numeric (log Kp)                            |
| <b>Absorption</b>   | P-glycoprotein substrate          | Yes                          | Yes                      | Yes                      | Categorical (Yes/No)                        |
| <b>Absorption</b>   | P-glycoprotein I inhibitor        | No                           | No                       | No                       | Categorical (Yes/No)                        |
| <b>Absorption</b>   | P-glycoprotein II inhibitor       | Yes                          | No                       | No                       | Categorical (Yes/No)                        |
| <b>Distribution</b> | VDss (human)                      | 0.377                        | 0.377                    | 0.086                    | Numeric (log L/kg)                          |
| <b>Distribution</b> | Fraction unbound (human)          | 0.051                        | 0.061                    | 0.090                    | Numeric (Fu)                                |
| <b>Distribution</b> | BBB permeability                  | −0.669                       | −1.09                    | −1.09                    | Numeric (log BB)                            |
| <b>Distribution</b> | CNS permeability                  | −2.946                       | −3.644                   | −2.957                   | Numeric (log PS)                            |
| <b>Metabolism</b>   | CYP2D6 substrate                  | No                           | No                       | No                       | Categorical (Yes/No)                        |
| <b>Metabolism</b>   | CYP3A4 substrate                  | No                           | No                       | No                       | Categorical (Yes/No)                        |
| <b>Metabolism</b>   | CYP1A2 inhibitor                  | Yes                          | Yes                      | Yes                      | Categorical (Yes/No)                        |
| <b>Metabolism</b>   | CYP2C19 inhibitor                 | Yes                          | No                       | No                       | Categorical (Yes/No)                        |
| <b>Metabolism</b>   | CYP2C9 inhibitor                  | Yes                          | No                       | Yes                      | Categorical (Yes/No)                        |
| <b>Metabolism</b>   | CYP2D6 inhibitor                  | No                           | No                       | No                       | Categorical (Yes/No)                        |
| <b>Metabolism</b>   | CYP3A4 inhibitor                  | Yes                          | No                       | No                       | Categorical (Yes/No)                        |
| <b>Excretion</b>    | Total Clearance                   | 0.662                        | 0.922                    | 0.763                    | Numeric (log ml/min/kg)                     |
| <b>Excretion</b>    | Renal OCT2 substrate              | Yes                          | No                       | No                       | Categorical (Yes/No)                        |
| <b>Toxicity</b>     | AMES toxicity                     | Yes                          | No                       | No                       | Categorical (Yes/No)                        |
| <b>Toxicity</b>     | Max. tolerated dose (human)       | 0.238                        | 0.954                    | 0.794                    | Numeric (log mg/kg/day)                     |
| <b>Toxicity</b>     | hERG I inhibitor                  | No                           | No                       | No                       | Categorical (Yes/No)                        |
| <b>Toxicity</b>     | hERG II inhibitor                 | No                           | Yes                      | No                       | Categorical (Yes/No)                        |
| <b>Toxicity</b>     | Oral Rat Acute Toxicity (LD50)    | 2.523                        | 1.933                    | 2.371                    | Numeric (mol/kg)                            |
| <b>Toxicity</b>     | Oral Rat Chronic Toxicity (LOAEL) | 1.645                        | 2.338                    | 2.022                    | Numeric (log mg/kg_bw/day)                  |
| <b>Toxicity</b>     | Hepatotoxicity                    | Yes                          | No                       | No                       | Categorical (Yes/No)                        |
| <b>Toxicity</b>     | Skin Sensitisation                | No                           | No                       | No                       | Categorical (Yes/No)                        |
| <b>Toxicity</b>     | <i>T.Pyriformis</i> toxicity      | 0.285                        | 0.306                    | 0.302                    | Numeric (log ug/L)                          |
| <b>Toxicity</b>     | Minnow toxicity                   | 1.212                        | 0.982                    | 1.795                    | Numeric (log mM)                            |

**Table S3.** Analysis of in silico toxicity of malvidin and cyanidin (Prediction of ADMET).

| TOXICITY                         |                 |                 |                 |                 |
|----------------------------------|-----------------|-----------------|-----------------|-----------------|
|                                  |                 | <i>Cyanidin</i> |                 | <i>Malvidin</i> |
| Human Ether-a-go-go-Related Gene | Weak inhibitor  | 0.9508          | Weak inhibitor  | 0.9620          |
| Inhibition                       | Non-inhibitor   | 0.8062          | Non-inhibitor   | 0.8114          |
| AMES Toxicity                    | Non AMES toxic  | 0.8841          | Non AMES toxic  | 0.9211          |
| Carcinogens                      | Non-carcinogens | 0.9044          | Non-carcinogens | 0.8868          |
| Fish Toxicity                    | High FHMT       | 0.9381          | High FHMT       | 0.8027          |
| Tetrahymena Pyriformis Toxicity  | High TPT        | 0.9938          | High TPT        | 0.9874          |
| Honey Bee Toxicity               | High HBT        | 0.6271          | High HBT        | 0.7023          |

|                               |                         |        |                         |        |
|-------------------------------|-------------------------|--------|-------------------------|--------|
| Biodegradation                | Not ready biodegradable | 0.9082 | Not ready biodegradable | 0.9561 |
| Acute Oral Toxicity           | II                      | 0.5617 | III                     | 0.5653 |
| Carcinogenicity (Three-class) | Non-required            | 0.5895 | Non-required            | 0.5696 |

Toxicity result from the in silico prediction of the compounds malvidin and cyanidin. The Immd platform was used and using the smile of each compound (respectively: COC1=CC(=CC(=C1O)OC)C2=[O+]C3=CC(=CC(=C3C=C2O)O)O.[Cl-] and C1=CC(=C(C=C1C2=[O+]C3=CC(=CC(=C3C=C2O)O)O)O)O.[Cl-]).

### Superoxide dismutase (SOD)

Representations of the most significant structural details of this system.

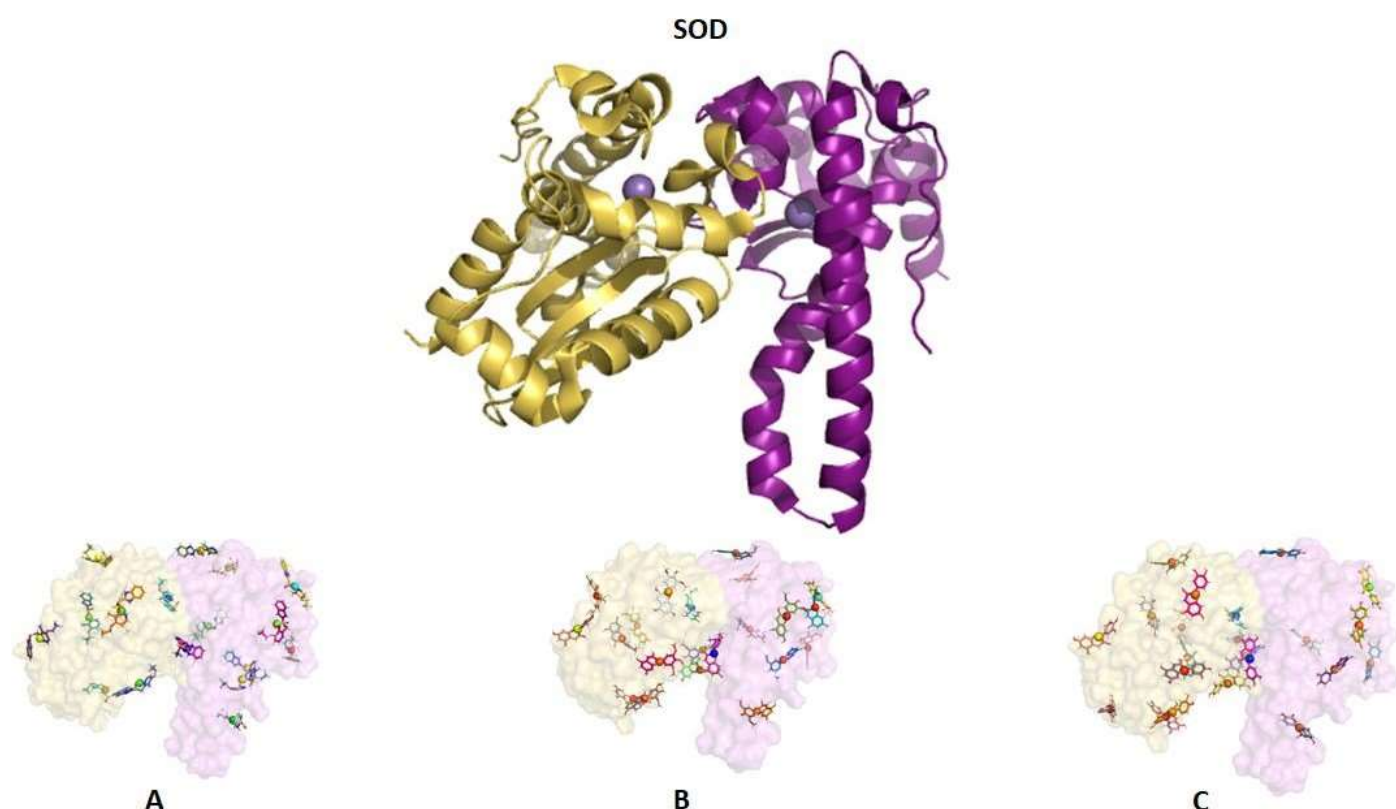

**Figure S3.** Structure of Superoxide dismutase (SOD) protein - PDB 1N0J, docking in chain A and B, where the representations: A, B and C, correspond respectively to the mapping of affinity sites of the molecules Lansoprazole, Malvidin and Cyanidin. Mn<sup>2+</sup> ion shown colored in purple ball.

**Table S4.** Main molecular interactions detected in the protein (SOD).

| Compound     | Residue | Chain | Interaction         |
|--------------|---------|-------|---------------------|
| lansoprazole | TYR 34  | A     | hydrophobic contact |
|              | GLN 119 | B     |                     |
|              | ASN 171 | B     |                     |
|              | HIS 30  | A     | hydrogen bonding    |
|              | GLY 117 | B     |                     |
|              | PHE 66  | A     | pi-stacking         |
|              | PHE 66  | A     |                     |
| malvidin     | ASN 171 | B     | halogen bonding     |
|              | GLN 119 | B     | hydrophobic contact |
|              | HIS30   | A     | hydrogen bonding    |

|          |         |   |                     |
|----------|---------|---|---------------------|
| cyanidin | HIS 30  | A |                     |
|          | ASN 67  | A |                     |
|          | VAL 118 | B |                     |
|          | PHE 66  | A | pi-stacking         |
|          | PHE 66  | A | hydrophobic contact |
|          | GLN 119 | B |                     |
|          | HIS 30  | A | hydrogen bonding    |
|          | ASN 67  | A |                     |
|          | GLY 117 | B |                     |
|          | GLU 162 | B |                     |
|          | HIS 163 | A |                     |
|          | PHE 66  | A | pi-stacking         |

Table S5. Details of Superoxide dismutase (SOD) protein binding site mapping.

| Superoxide dismutase (SOD) - molecule Lansoprazole |                                  |             |          |                      |
|----------------------------------------------------|----------------------------------|-------------|----------|----------------------|
| Cluster                                            | affinity<br>energy<br>(kcal/mol) | n° of poses | bestpose | site                 |
| 1                                                  | −7.2                             | 87          | 362      | 16.08, −8.56, 40.91  |
| 2                                                  | −7.1                             | 85          | 270      | 20.62, −1.21, 61.95  |
| 3                                                  | −6.6                             | 44          | 388      | 14.90, −34.42, 60.74 |
| 4                                                  | −6.2                             | 18          | 55       | 5.70, −0.36, 26.01   |
| 5                                                  | −6.2                             | 22          | 251      | 3.58, −1.88, 74.61   |
| 6                                                  | −6.1                             | 24          | 109      | 10.68, 10.58, 54.36  |
| 7                                                  | −6.0                             | 13          | 14       | 34.75, 7.67, 53.80   |
| 8                                                  | −6.0                             | 13          | 325      | 4.81, −14.72, 46.88  |
| 9                                                  | −5.9                             | 43          | 127      | 18.25, 10.51, 33.13  |
| 10                                                 | −5.9                             | 9           | 273      | 17.11, −22.54, 68.91 |
| 11                                                 | −5.9                             | 11          | 301      | 14.47, −26.98, 42.38 |
| 12                                                 | −5.8                             | 13          | 181      | 27.50, 24.91, 39.27  |
| 13                                                 | −5.7                             | 5           | 350      | 5.24, −10.33, 67.58  |
| 14                                                 | −5.7                             | 2           | 327      | −4.68, −16.86, 58.41 |
| 15                                                 | −5.6                             | 3           | 11       | 31.09, 1.25, 30.44   |
| 16                                                 | −5.5                             | 2           | 213      | 28.08, −19.37, 45.12 |
| 17                                                 | −5.3                             | 1           | 196      | 2.88, 16.97, 43.25   |
| 18                                                 | −4.6                             | 1           | 394      | −6.62, −29.77, 60.61 |
| Superoxide dismutase (SOD) - molecule Malvidin     |                                  |             |          |                      |
| Cluster                                            | affinity<br>energy<br>(kcal/mol) | n° of poses | bestpose | site                 |
| 1                                                  | −7.5                             | 87          | 68       | 14.46, −8.44, 40.64  |
| 2                                                  | −7.4                             | 83          | 116      | 16.84, 0.80, 60.76   |
| 3                                                  | −6.7                             | 43          | 378      | 13.34, −34.24, 62.17 |
| 4                                                  | −6.2                             | 36          | 85       | 29.02, 24.49, 40.70  |
| 5                                                  | −5.8                             | 6           | 18       | 35.30, 5.69, 53.63   |
| 6                                                  | −5.7                             | 10          | 57       | 5.84, −5.10, 47.37   |
| 7                                                  | −5.7                             | 18          | 244      | 1.32, −2.15, 70.86   |
| 8                                                  | −5.6                             | 2           | 149      | 7.60, 1.43, 54.24    |
| 9                                                  | −5.5                             | 3           | 215      | 28.14, −20.82, 46.63 |
| 10                                                 | −5.5                             | 11          | 125      | 28.14, −20.82, 46.63 |

|    |      |    |     |                      |
|----|------|----|-----|----------------------|
| 11 | −5.5 | 11 | 305 | 14.85, −26.77, 42.46 |
| 12 | −5.5 | 6  | 293 | 1.22, −22.44, 46.53  |
| 13 | −5.4 | 15 | 128 | 13.25, 10.79, 34.87  |
| 14 | −5.4 | 11 | 326 | 6.51, −15.96, 66.60  |
| 15 | −5.4 | 13 | 49  | 5.28, 0.29, 25.20    |
| 16 | −5.3 | 2  | 220 | 25.38, −13.80, 71.83 |
| 17 | −5.3 | 6  | 274 | 17.74, −26.98, 68.04 |
| 18 | −5.3 | 4  | 95  | 11.24, 19.16, 54.94  |
| 19 | −5.2 | 11 | 12  | 28.14, 13.44, 32.76  |
| 20 | −5.2 | 6  | 394 | −4.78, −31.93, 59.19 |
| 21 | −5.1 | 12 | 99  | −4.78, −31.93, 59.19 |

#### Superoxide dismutase (SOD) – molecule Cyanidin

| Cluster | affinityenergy<br>(kcal/mol) | n° ofposes | bestpose | site                 |
|---------|------------------------------|------------|----------|----------------------|
| 1       | −8.6                         | 96         | 160      | 14.83, −8.11, 41.47  |
| 2       | −8.3                         | 86         | 119      | 17.14, 0.55, 59.81   |
| 3       | −7.0                         | 44         | 389      | 16.33, −34.50, 59.70 |
| 4       | −6.5                         | 37         | 183      | 28.61, 24.97, 40.49  |
| 5       | −6.2                         | 18         | 77       | 20.13, 8.60, 31.68   |
| 6       | −6.2                         | 7          | 54       | 6.29, −5.76, 45.95   |
| 7       | −6.1                         | 17         | 135      | 11.29, 19.59, 54.58  |
| 8       | −6.1                         | 8          | 305      | 1.08, −22.69, 46.83  |
| 9       | −6.1                         | 19         | 297      | −4.69, −31.25, 60.22 |
| 10      | −6.0                         | 6          | 20       | 35.09, 6.07, 53.73   |
| 11      | −6.0                         | 4          | 148      | 9.66, 4.84, 54.52    |
| 12      | −6.0                         | 9          | 351      | 6.95, −16.25, 66.72  |
| 13      | −6.0                         | 15         | 243      | 1.07, −1.91, 70.12   |
| 14      | −5.9                         | 2          | 216      | 28.32, −20.73, 46.76 |
| 15      | −5.9                         | 5          | 220      | 17.16, −22.73, 69.60 |
| 16      | −5.7                         | 4          | 9        | 30.20, −0.62, 31.14  |
| 17      | −5.7                         | 9          | 48       | 6.32, 4.35, 34.96    |
| 18      | −5.6                         | 1          | 104      | 23.86, 15.98, 59.65  |
| 19      | −5.6                         | 6          | 47       | 6.82, −1.14, 24.03   |
| 20      | −5.4                         | 1          | 196      | 2.32, 17.96, 44.79   |
| 21      | −5.3                         | 1          | 197      | 8.68, 28.29, 39.38   |
| 22      | −5.3                         | 1          | 51       | 0.52, −11.57, 32.15  |

#### Catalase (CAT)

Representations of the most significant structural details of this system.

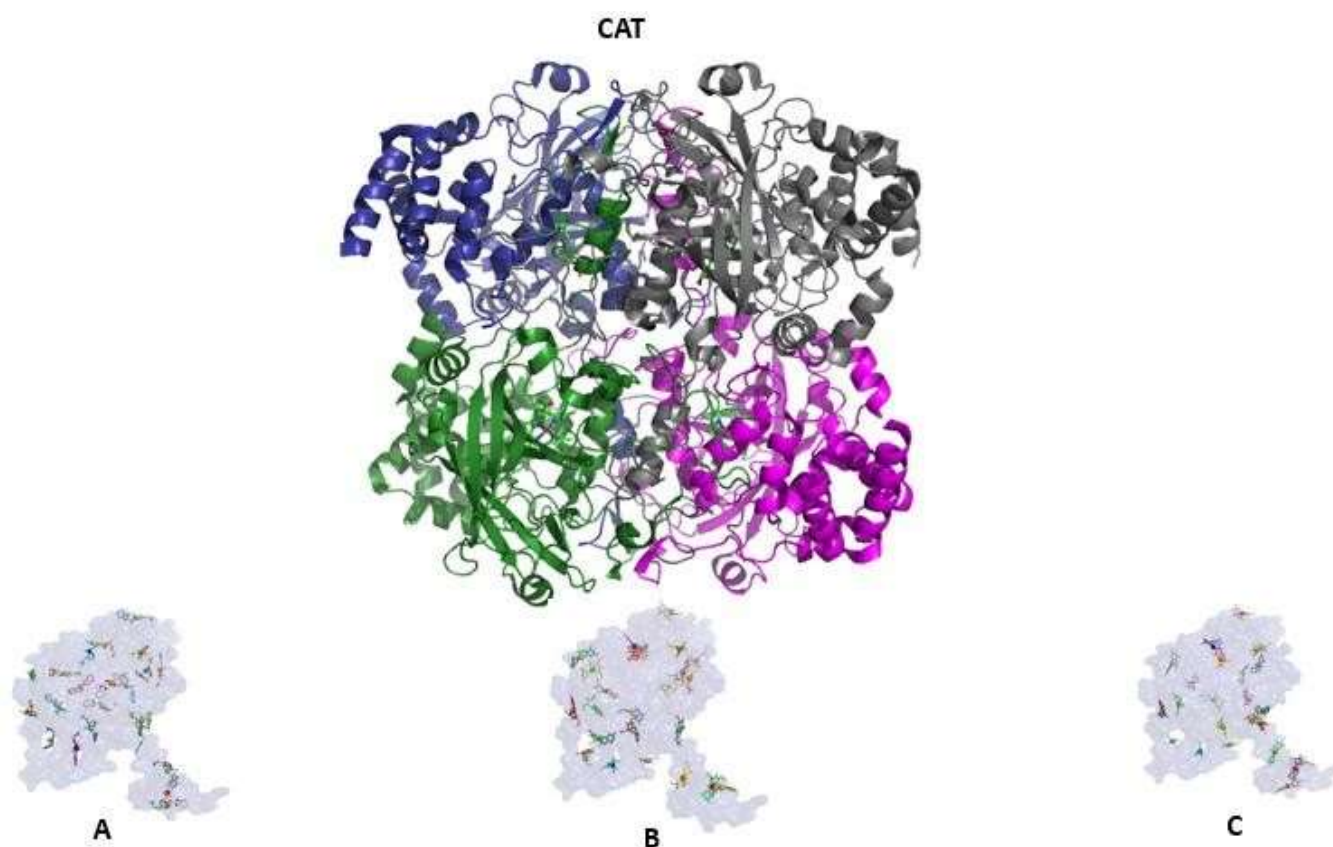

**Figure S4.** Structure of Catalase (CAT) protein - PDB 1F4J, docking in chain A, where the representations: A, B, and C, correspond respectively to the affinity site mapping of the molecules Lansoprazole, Malvidin, and Cyanidin. Heme group shown colored in green.

**Table S6.** Major molecular interactions detected in the protein (CAT).

| Compound     | residue | chain | interaction         |
|--------------|---------|-------|---------------------|
| lansoprazole | PRO 151 | A     | hydrophobic contact |
|              | TYR 215 | A     |                     |
|              | VAL 302 | A     |                     |
|              | GLN 442 | A     |                     |
|              | ALA 445 | A     |                     |
|              | TRP 303 | A     | hydrogen bonding    |
|              | LYS 306 | A     |                     |
|              | HIS 305 | A     |                     |
| malvidin     | GLN 387 | A     | hydrophobic contact |
|              | ARG 382 | A     | hydrogen bonding    |
|              | ARG 382 | A     |                     |
|              | ASP 389 | A     |                     |
|              | ASP 396 | A     |                     |
|              | ASP 396 | A     |                     |
|              | ASN 397 | A     |                     |
|              | GLN 398 | A     |                     |
|              | GLN 398 | A     |                     |
| cyanidin     | HIS 372 | A     | pi-stacking         |
|              | GLN 387 | A     | hydrophobic contact |
|              | ARG 382 | A     | hydrogen bonding    |
|              | GLN 387 |       |                     |

|         |   |             |
|---------|---|-------------|
| GLN 395 | A |             |
| ASP 396 | A |             |
| ASN 397 | A |             |
| GLN 398 | A |             |
| GLN 398 | A |             |
| HIS 372 | A | pi-stacking |

**Table S7.** Details of Catalase (CAT) binding site mapping.

| Catalase (CAT) – molecule Lansoprazole |                                  |             |          |                      |
|----------------------------------------|----------------------------------|-------------|----------|----------------------|
| Cluster                                | affinity<br>energy<br>(kcal/mol) | n° of poses | bestpose | site                 |
| 1                                      | −7.7                             | 90          | 211      | 63.32, 77.67, 4.88   |
| 2                                      | −7.6                             | 86          | 370      | 47.04, 81.47, 38.50  |
| 3                                      | −7.2                             | 71          | 98       | 56.62, 99.91, 3.96   |
| 4                                      | −6.8                             | 35          | 122      | 63.38, 93.60, 26.12  |
| 5                                      | −6.8                             | 37          | 47       | 39.21, 99.02, 22.66  |
| 6                                      | −6.7                             | 28          | 295      | 36.10, 76.25, 23.14  |
| 7                                      | −6.6                             | 30          | 406      | 74.45, 77.91, 21.02  |
| 8                                      | −6.6                             | 6           | 200      | 68.75, 63.09, 22.41  |
| 9                                      | −6.5                             | 11          | 166      | 68.64, 103.41, 17.42 |
| 10                                     | −6.4                             | 10          | 405      | 73.71, 87.09, 24.58  |
| 11                                     | −6.4                             | 2           | 187      | 50.90, 90.04, −4.83  |
| 12                                     | −6.4                             | 31          | 35       | 27.76, 109.66, 30.13 |
| 13                                     | −6.3                             | 8           | 464      | 68.10, 92.24, −12.26 |
| 14                                     | −6.3                             | 3           | 393      | 51.32, 72.22, 39.66  |
| 15                                     | −6.2                             | 8           | 458      | 79.33, 92.57, 6.86   |
| 16                                     | −6.2                             | 11          | 247      | 35.12, 93.63, 15.09  |
| 17                                     | −6.0                             | 1           | 72       | 64.03, 75.55, 30.58  |
| 18                                     | −6.0                             | 4           | 68       | 58.88, 62.88, 32.27  |
| 19                                     | −5.7                             | 3           | 9        | 19.72, 111.08, 39.82 |
| 20                                     | −5.6                             | 1           | 448      | 65.34, 112.18, 5.45  |
| 21                                     | −5.6                             | 6           | 253      | 38.32, 76.64, 4.68   |
| 22                                     | −4.9                             | 1           | 0        | 16.13, 104.60, 32.52 |
| Catalase (CAT) – molecule Malvidin     |                                  |             |          |                      |
| Cluster                                | affinityenergy<br>(kcal/mol)     | n° of poses | bestpose | site                 |
| 1                                      | −7.6                             | 65          | 352      | 43.60, 80.93, 41.65  |
| 2                                      | −7.3                             | 86          | 424      | 62.97, 79.53, 2.87   |
| 3                                      | −6.5                             | 24          | 399      | 74.97, 74.31, 20.01  |
| 4                                      | −6.5                             | 83          | 184      | 57.12, 100.14, 4.35  |
| 5                                      | −6.5                             | 15          | 45       | 41.14, 92.62, 35.63  |
| 6                                      | −6.4                             | 34          | 40       | 40.86, 99.17, 21.12  |
| 7                                      | −6.3                             | 22          | 321      | 74.47, 83.58, 26.37  |
| 8                                      | −6.2                             | 23          | 197      | 63.78, 75.77, 30.02  |
| 9                                      | −6.2                             | 9           | 113      | 49.12, 75.25, 35.35  |
| 10                                     | −6.1                             | 17          | 72       | 52.69, 61.75, 29.46  |
| 11                                     | −6.1                             | 7           | 218      | 51.99, 90.48, −4.61  |
| 12                                     | −6.1                             | 23          | 110      | 36.55, 77.72, 24.29  |
| 13                                     | −5.9                             | 17          | 457      | 79.51, 92.28, 7.11   |

|    |      |    |     |                      |
|----|------|----|-----|----------------------|
| 14 | −5.9 | 4  | 49  | 64.00, 92.65, 27.91  |
| 15 | −5.8 | 4  | 450 | 69.15, 106.57, 14.45 |
| 16 | −5.6 | 34 | 15  | 24.30, 115.47, 31.16 |
| 17 | −5.5 | 1  | 67  | 64.07, 61.78, 13.52  |
| 18 | −5.5 | 3  | 385 | 55.76, 76.74, 45.78  |
| 19 | −5.3 | 4  | 464 | 69.93, 91.64, −12.38 |
| 20 | −5.3 | 1  | 252 | 50.75, 74.02, 2.44   |
| 21 | −5.3 | 4  | 251 | 38.40, 90.75, 0.70   |
| 22 | −5.1 | 1  | 448 | 69.58, 112.86, 1.11  |
| 23 | −5.0 | 1  | 1   | 28.48, 100.99, 33.14 |
| 24 | −4.5 | 1  | 0   | 17.94, 105.83, 29.02 |

#### Catalase (CAT) – molecule Cyanidin

| Cluster | affinityenergy<br>(kcal/mol) | n° ofposes | bestpose | site                 |
|---------|------------------------------|------------|----------|----------------------|
| 1       | −7.9                         | 70         | 344      | 44.16, 81.28, 41.84  |
| 2       | −7.7                         | 100        | 256      | 63.47, 79.58, 2.58   |
| 3       | −7.2                         | 14         | 308      | 42.03, 92.50, 36.09  |
| 4       | −6.9                         | 26         | 407      | 73.80, 87.08, 25.38  |
| 5       | −6.8                         | 8          | 141      | 63.41, 92.67, 27.13  |
| 6       | −6.8                         | 69         | 90       | 57.28, 100.10, 4.57  |
| 7       | −6.8                         | 17         | 39       | 39.95, 99.86, 23.38  |
| 8       | −6.7                         | 34         | 391      | 61.76, 75.38, 30.61  |
| 9       | −6.7                         | 22         | 299      | 39.96, 97.38, 16.66  |
| 10      | −6.6                         | 3          | 149      | 57.71, 104.11, 20.84 |
| 11      | −6.6                         | 27         | 296      | 36.70, 78.43, 24.39  |
| 12      | −6.5                         | 19         | 76       | 52.55, 61.66, 28.93  |
| 13      | −6.4                         | 6          | 266      | 75.67, 74.07, 18.43  |
| 14      | −6.3                         | 17         | 163      | 79.34, 91.86, 6.95   |
| 15      | −6.2                         | 4          | 187      | 52.34, 90.78, −4.35  |
| 16      | −6.0                         | 2          | 450      | 69.04, 106.39, 15.09 |
| 17      | −6.0                         | 3          | 382      | 55.67, 75.94, 45.14  |
| 18      | −5.9                         | 1          | 249      | 29.76, 85.72, 16.08  |
| 19      | −5.9                         | 21         | 18       | 24.14, 115.36, 31.04 |
| 20      | −5.9                         | 13         | 10       | 20.22, 110.55, 40.43 |
| 21      | −5.6                         | 3          | 467      | 70.10, 91.25, −12.26 |
| 22      | −5.5                         | 1          | 448      | 72.28, 112.59, 1.84  |
| 23      | −5.3                         | 1          | 215      | 50.88, 75.12, 2.13   |
| 24      | −5.3                         | 1          | 1        | 29.63, 104.31, 30.23 |
| 25      | −5.0                         | 1          | 0        | 17.65, 105.68, 29.60 |

#### Glutathione reductase (GSH)

Representations of the most significant structural details of this system.

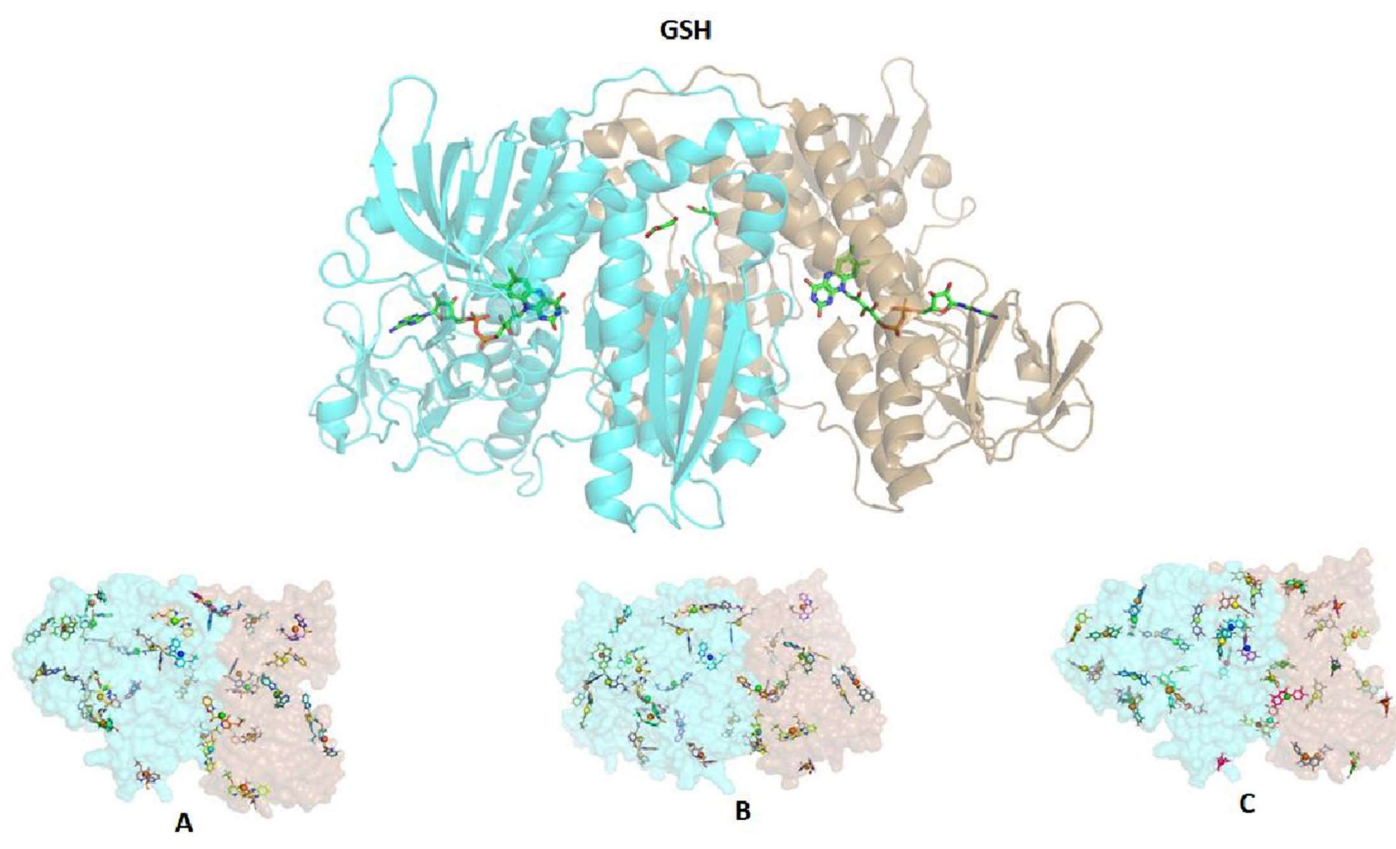

**Figure S5.** Structure of Glutathione reductase (GSH) protein - PDB 3SQP, docking chain A and B, where the representations: **A**, **B**, and **C**, correspond respectively to the affinity site mapping of Lansoprazole, Malvidin, and Cyanidin molecules. FAD and glycerol molecules shown colored in green.

**Table S8.** Major molecular interactions detected in the protein (GSH).

| Compound     | residue | chain | interaction         |
|--------------|---------|-------|---------------------|
| lansoprazole | VAL 74  | A     | hydrophobic contact |
|              | PHE 78  | A     |                     |
|              | PHE 78  | A     |                     |
|              | PHE 78  | A     |                     |
|              | TYR 407 | B     |                     |
|              | LEU 438 | B     |                     |
|              | LEU 438 | B     | hydrogen bonding    |
|              | LYS 67  | A     |                     |
|              | ASN 71  | A     |                     |
|              | GLY 439 | B     |                     |
|              | ASP 441 | A     |                     |
|              | ASP 441 | A     |                     |
| malvidin     | ASP 441 | A     | salt bridge         |
|              | HIS 75  | A     | pi-stacking         |
|              | PHE 78  | B     |                     |
|              | VAL 74  | B     |                     |
|              | PHE 78  | A     |                     |
|              | PHE 78  | A     | hydrophobic contact |
|              | PHE 78  | A     |                     |
|              | PHE 78  | B     |                     |

|          |         |   |                     |
|----------|---------|---|---------------------|
| cyanidin | TYR 407 | A | hydrogen bonding    |
|          | HIS 75  | A |                     |
|          | HIS 75  | B |                     |
|          | PHE 78  | A | pi-stacking         |
|          | PHE 78  | B |                     |
|          | VAL 74  | A | hydrophobic contact |
|          | VAL 74  | B |                     |
|          | PHE 78  | A |                     |
|          | PHE 78  | A |                     |
|          | PHE 78  | B |                     |
|          | PHE 78  | B |                     |
|          | PHE 78  | B |                     |
|          | TYR 407 | B |                     |

Table S9. Mapping details of Glutathione reductase (GSH) binding sites.

| Glutathione reductase (GSH) – molecule Lansoprazole |                                  |             |          |                        |
|-----------------------------------------------------|----------------------------------|-------------|----------|------------------------|
| Cluster                                             | affinity<br>energy<br>(kcal/mol) | n° of poses | bestpose | site                   |
| 1                                                   | −9.0                             | 1477        | 397      | −13.19, −35.94, −35.25 |
| 2                                                   | −8.0                             | 83          | 15       | −35.91, −20.57, −32.62 |
| 3                                                   | −7.9                             | 78          | 476      | −35.86, −54.48, −37.44 |
| 4                                                   | −7.6                             | 90          | 199      | −24.13, −29.37, −15.31 |
| 5                                                   | −7.5                             | 91          | 644      | −24.12, −46.01, −54.72 |
| 6                                                   | −7.4                             | 26          | 90       | −22.27, −19.50, −32.37 |
| 7                                                   | −7.4                             | 25          | 549      | −22.28, −55.53, −37.59 |
| 8                                                   | −7.2                             | 54          | 87       | −13.54, −12.56, −20.41 |
| 9                                                   | −7.2                             | 53          | 548      | −13.54, −62.49, −49.55 |
| 10                                                  | −7.1                             | 26          | 526      | 2.30, −35.62, −42.11   |
| 11                                                  | −7.1                             | 34          | 65       | 2.29, −39.42, −27.88   |
| 12                                                  | −6.8                             | 18          | 150      | −17.23, −28.48, −2.83  |
| 13                                                  | −6.7                             | 4           | 226      | −3.54, −40.97, −20.72  |
| 14                                                  | −6.7                             | 7           | 634      | −3.55, −34.09, −49.25  |
| 15                                                  | −6.7                             | 21          | 610      | −17.19, −46.44, −67.11 |
| 16                                                  | −6.6                             | 21          | 295      | −27.45, −12.06, −4.23  |
| 17                                                  | −6.5                             | 22          | 756      | −27.46, −62.98, −65.74 |
| 18                                                  | −6.3                             | 1           | 302      | −37.78, −22.17, −16.30 |
| 19                                                  | −6.2                             | 3           | 762      | −38.09, −52.70, −53.76 |
| 20                                                  | −6.2                             | 3           | 26       | −46.43, −7.88, −25.14  |
| 21                                                  | −6.2                             | 20          | 465      | −46.45, −67.14, −44.83 |
| 22                                                  | −6.0                             | 23          | 716      | −12.73, −30.45, −66.64 |
| 23                                                  | −6.0                             | 6           | 252      | −12.73, −44.65, −3.27  |
| 24                                                  | −6.0                             | 6           | 211      | −27.99, −39.26, −9.44  |
| 25                                                  | −6.0                             | 3           | 672      | −27.99, −35.75, −60.52 |
| 26                                                  | −5.8                             | 5           | 104      | −32.98, −1.10, −36.37  |
| 27                                                  | −5.8                             | 9           | 566      | −32.99, −73.95, −33.61 |
| 28                                                  | −5.7                             | 12          | 725      | 0.66, −53.63, −59.65   |
| 29                                                  | −5.7                             | 2           | 432      | −42.16, −43.27, −44.39 |
| 30                                                  | −5.6                             | 11          | 243      | 0.05, −20.59, −13.58   |
| 31                                                  | −5.6                             | 2           | 837      | −38.21, −22.36, −52.37 |

| 32                                                         | −5.5                         | 4          | 128      | −21.79, 1.44, −12.27   |
|------------------------------------------------------------|------------------------------|------------|----------|------------------------|
| 33                                                         | −5.5                         | 4          | 589      | −21.82, −76.47, −57.71 |
| 34                                                         | −5.5                         | 2          | 377      | −39.50, −52.36, −16.92 |
| 35                                                         | −5.0                         | 1          | 237      | −10.39, −15.64, −9.05  |
| <b>Glutathione reductase (GSH) – molecule Malvidin</b>     |                              |            |          |                        |
| Cluster                                                    | affinityenergy<br>(kcal/mol) | n° ofposes | bestpose | site                   |
| 1                                                          | −8.5                         | 132        | 814      | −10.37, −39.44, −35.69 |
| 2                                                          | −7.4                         | 69         | 497      | −14.55, −62.99, −50.15 |
| 3                                                          | −7.4                         | 71         | 43       | −14.57, −12.08, −19.80 |
| 4                                                          | −7.2                         | 69         | 902      | −34.12, −21.34, −32.68 |
| 5                                                          | −7.2                         | 70         | 457      | −34.14, −53.69, −37.30 |
| 6                                                          | −7.0                         | 30         | 298      | −35.64, −20.99, −12.89 |
| 7                                                          | −7.0                         | 32         | 759      | −35.65, −54.05, −57.08 |
| 8                                                          | −6.9                         | 17         | 88       | −16.84, −21.79, −36.57 |
| 9                                                          | −6.9                         | 15         | 392      | −16.84, −53.26, −33.41 |
| 10                                                         | −6.9                         | 68         | 201      | −22.92, −26.52, −13.65 |
| 11                                                         | −6.9                         | 69         | 638      | −22.94, −48.54, −56.30 |
| 12                                                         | −6.8                         | 11         | 664      | −18.27, −45.26, −64.65 |
| 13                                                         | −6.8                         | 11         | 206      | −18.31, −29.83, −5.39  |
| 14                                                         | −6.6                         | 5          | 561      | −25.29, −58.86, −37.93 |
| 15                                                         | −6.6                         | 7          | 100      | −25.43, −15.99, −32.08 |
| 16                                                         | −6.5                         | 14         | 211      | −32.81, −33.61, −17.61 |
| 17                                                         | −6.5                         | 13         | 897      | −32.82, −41.46, −52.22 |
| 18                                                         | −6.4                         | 30         | 394      | −4.57, −43.82, −22.87  |
| 19                                                         | −6.4                         | 30         | 680      | −4.59, −31.28, −47.13  |
| 20                                                         | −6.0                         | 15         | 114      | −26.85, −10.09, −4.29  |
| 21                                                         | −6.0                         | 15         | 575      | −26.88, −64.94, −65.70 |
| 22                                                         | −5.9                         | 19         | 263      | 0.45, −20.69, −11.88   |
| 23                                                         | −5.9                         | 17         | 724      | 0.43, −54.34, −58.11   |
| 24                                                         | −5.8                         | 3          | 236      | −11.12, −15.61, −6.53  |
| 25                                                         | −5.8                         | 4          | 698      | −11.16, −59.44, −63.42 |
| 26                                                         | −5.8                         | 1          | 672      | −24.69, −25.44, −53.17 |
| 27                                                         | −5.7                         | 2          | 541      | 4.70, −43.73, −48.02   |
| 28                                                         | −5.7                         | 2          | 80       | 4.70, −31.32, −21.98   |
| 29                                                         | −5.6                         | 1          | 214      | −27.41, −41.71, −9.30  |
| 30                                                         | −5.6                         | 16         | 28       | −44.88, −5.05, −19.75  |
| 31                                                         | −5.6                         | 17         | 489      | −44.91, −69.97, −50.21 |
| 32                                                         | −5.6                         | 6          | 712      | −7.54, −31.92, −63.80  |
| 33                                                         | −5.4                         | 4          | 260      | −7.54, −43.13, −6.17   |
| 34                                                         | −5.3                         | 1          | 255      | −18.37, −38.80, 4.86   |
| 35                                                         | −5.3                         | 1          | 716      | −18.37, −36.19, −74.84 |
| 36                                                         | −5.3                         | 3          | 127      | −22.61, 2.19, −11.12   |
| 37                                                         | −5.3                         | 3          | 589      | −22.63, −77.20, −58.86 |
| 38                                                         | −5.3                         | 11         | 562      | −30.14, −78.56, −37.32 |
| 39                                                         | −5.3                         | 10         | 1        | −30.30, 3.50, −32.77   |
| 40                                                         | −5.0                         | 3          | 836      | −40.48, −21.78, −52.49 |
| 41                                                         | −5.0                         | 3          | 375      | −40.49, −53.24, −17.44 |
| 42                                                         | −5.0                         | 1          | 436      | −43.12, −47.35, −40.61 |
| 43                                                         | −5.0                         | 1          | 432      | −43.15, −27.74, −29.31 |
| <b>Glutathione reductase (GSH) – molecule Lansoprazole</b> |                              |            |          |                        |

| Cluster | affinityenergy<br>(kcal/mol) | n° ofposes | bestpose | site                   |
|---------|------------------------------|------------|----------|------------------------|
| 1       | -8.9                         | 81         | 527      | -9.63, -36.01, -34.37  |
| 2       | -8.9                         | 73         | 451      | -14.95, -41.24, -36.53 |
| 3       | -7.9                         | 69         | 918      | -34.24, -21.13, -33.39 |
| 4       | -7.9                         | 72         | 472      | -34.26, -53.91, -36.57 |
| 5       | -7.5                         | 76         | 273      | -14.83, -12.35, -19.59 |
| 6       | -7.5                         | 82         | 618      | -14.86, -62.65, -50.39 |
| 7       | -7.5                         | 59         | 176      | -27.36, -31.44, -17.51 |
| 8       | -7.5                         | 61         | 829      | -27.63, -43.38, -52.45 |
| 9       | -7.4                         | 22         | 99       | -24.28, -18.45, -30.99 |
| 10      | -7.4                         | 12         | 560      | -24.30, -56.58, -38.98 |
| 11      | -7.1                         | 2          | 385      | -16.75, -53.75, -33.71 |
| 12      | -7.0                         | 1          | 844      | -16.80, -21.26, -36.32 |
| 13      | -7.0                         | 40         | 709      | -17.48, -45.51, -65.05 |
| 14      | -7.0                         | 43         | 250      | -17.48, -29.50, -4.94  |
| 15      | -6.9                         | 17         | 136      | -35.84, -21.12, -12.43 |
| 16      | -6.9                         | 16         | 770      | -35.87, -53.89, -57.53 |
| 17      | -6.8                         | 9          | 218      | -4.91, -43.31, -22.73  |
| 18      | -6.8                         | 10         | 679      | -4.94, -31.75, -47.25  |
| 19      | -6.7                         | 18         | 71       | 3.15, -34.25, -41.01   |
| 20      | -6.7                         | 17         | 532      | 3.15, -40.81, -28.98   |
| 21      | -6.6                         | 15         | 282      | -27.27, -9.70, -4.24   |
| 22      | -6.6                         | 15         | 743      | -27.30, -65.33, -65.74 |
| 23      | -6.4                         | 2          | 676      | -24.18, -25.69, -53.51 |
| 24      | -6.1                         | 1          | 632      | 5.19, -45.99, -48.21   |
| 25      | -6.1                         | 13         | 172      | -0.68, -20.27, -12.83  |
| 26      | -6.1                         | 10         | 633      | -0.70, -54.79, -57.15  |
| 27      | -6.1                         | 3          | 705      | -11.35, -59.05, -62.98 |
| 28      | -6.1                         | 13         | 26       | -46.80, -9.38, -22.25  |
| 29      | -6.1                         | 14         | 595      | -46.81, -65.68, -47.68 |
| 30      | -6.0                         | 4          | 255      | -11.65, -44.36, -3.23  |
| 31      | -6.0                         | 5          | 716      | -11.66, -30.70, -66.74 |
| 32      | -6.0                         | 3          | 237      | -11.80, -15.67, -6.23  |
| 33      | -6.0                         | 2          | 253      | -18.46, -37.93, 3.01   |
| 34      | -6.0                         | 2          | 714      | -18.47, -37.08, -72.98 |
| 35      | -6.0                         | 7          | 0        | -22.96, 2.43, -11.43   |
| 36      | -6.0                         | 8          | 461      | -23.00, -77.46, -58.54 |
| 37      | -6.0                         | 8          | 486      | -33.25, -71.34, -32.21 |
| 38      | -5.9                         | 6          | 105      | -33.19, -3.59, -37.67  |
| 39      | -5.7                         | 2          | 117      | -42.59, 1.84, -19.48   |
| 40      | -5.7                         | 1          | 580      | -42.62, -76.88, -50.50 |
| 41      | -5.4                         | 3          | 838      | -40.39, -21.83, -51.88 |
| 42      | -5.4                         | 3          | 377      | -40.42, -53.20, -18.09 |
| 43      | -5.3                         | 1          | 893      | -42.85, -47.29, -40.41 |
| 44      | -5.3                         | 1          | 432      | -42.88, -27.80, -29.56 |

### Myeloperoxidase (MPO)

Representations of the most significant structural details of this system.

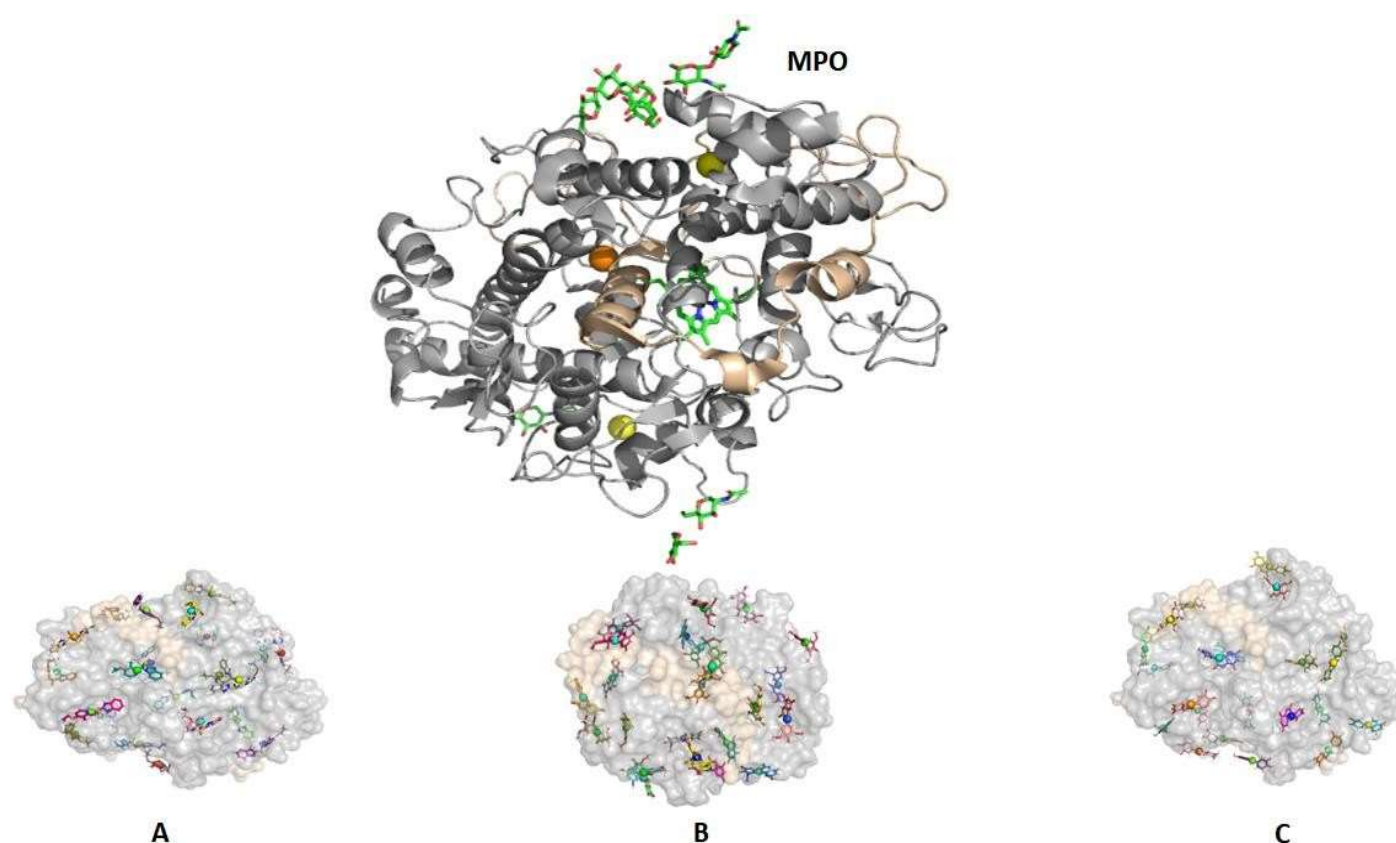

**Figure S6.** Structure of Myeloperoxidase (MPO) protein - PDB 7LAE, where the representations: **A**, **B**, and **C**, correspond respectively to the affinity site mapping of the molecules Lansoprazole, Malvidin, and Cyanidin.  $\text{Cl}^-$  and  $\text{Ca}^{2+}$  ion represented as a yellow and orange colored ball respectively; heme group; acetamido-2-deoxy-beta-D-glucopyranose; beta-D-manopyranose; alpha-D-manopyranose; and alpha-L-fucopyranose shown colored in green.

**Table S10.** Main molecular interactions detected in the Myeloperoxidase (MPO) protein.

| Compound     | residue | chain | interaction         |
|--------------|---------|-------|---------------------|
| lansoprazole | PRO 220 | B     | hydrophobic contact |
|              | PHE 366 | B     |                     |
|              | PHE 407 | B     |                     |
|              | VAL 410 | B     |                     |
|              | GLU 102 | A     | salt bridge         |
| malvidin     | THR 238 | B     | halogen bonding     |
|              | GLU 102 | A     | hydrophobic contact |
|              | PRO 145 | B     |                     |
| cyanidin     | LEU 415 | B     | hydrophobic contact |
|              | PHE 99  | A     |                     |
|              | PRO 145 | B     |                     |
| cyanidin     | LEU 415 | B     | hydrophobic contact |
|              | LEU 415 | B     |                     |

**Table S11.** Mapping details of Myeloperoxidase (MPO) binding sites.

| <b>Myeloperoxidase (MPO) – molecule Lansoprazole</b> |                                           |                    |                 |                        |
|------------------------------------------------------|-------------------------------------------|--------------------|-----------------|------------------------|
| <b>Cluster</b>                                       | <b>affinity<br/>energy<br/>(kcal/mol)</b> | <b>n° of poses</b> | <b>bestpose</b> | <b>site</b>            |
| 1                                                    | −7.5                                      | 116                | 228             | −6.07, 24.70, −23.04   |
| 2                                                    | −7.3                                      | 58                 | 515             | −2.52, −2.00, −51.39   |
| 3                                                    | −6.9                                      | 64                 | 536             | 14.45, 2.66, −11.41    |
| 4                                                    | −6.9                                      | 59                 | 487             | −5.39, −10.81, −28.77  |
| 5                                                    | −6.7                                      | 66                 | 202             | 17.03, 16.84, −39.87   |
| 6                                                    | −6.6                                      | 25                 | 112             | −28.14, 25.93, −24.62  |
| 7                                                    | −6.5                                      | 46                 | 122             | −22.79, 21.47, −4.57   |
| 8                                                    | −6.4                                      | 15                 | 169             | −3.81, 13.28, −49.56   |
| 9                                                    | −6.4                                      | 29                 | 474             | −4.38, −6.21, −9.40    |
| 10                                                   | −6.3                                      | 18                 | 438             | −19.28, −7.71, −8.49   |
| 11                                                   | −6.2                                      | 13                 | 357             | 20.49, 19.69, −18.59   |
| 12                                                   | −6.2                                      | 8                  | 387             | 7.22, 8.66, −5.25      |
| 13                                                   | −6.1                                      | 9                  | 523             | 8.66, −9.71, −28.09    |
| 14                                                   | −6.1                                      | 6                  | 312             | −25.43, 12.94, −33.73  |
| 15                                                   | −6.0                                      | 20                 | 422             | −31.72, 9.30, −16.51   |
| 16                                                   | −5.9                                      | 6                  | 88              | 5.06, 6.04, −31.26     |
| 17                                                   | −5.9                                      | 4                  | 95              | −9.59, 21.31, −34.61   |
| 18                                                   | −5.6                                      | 6                  | 393             | −0.47, 25.80, −5.49    |
| 19                                                   | −5.6                                      | 1                  | 68              | −9.16, 8.97, 2.81      |
| 20                                                   | −5.2                                      | 1                  | 158             | −24.38, 2.48, −36.75   |
| 21                                                   | −5.0                                      | 1                  | 554             | 19.72, 2.99, −37.38    |
| 22                                                   | −4.9                                      | 1                  | 218             | 9.03, 31.47, −31.93    |
| <b>Myeloperoxidase (MPO) – molecule Malvidin</b>     |                                           |                    |                 |                        |
| <b>Cluster</b>                                       | <b>affinityenergy<br/>(kcal/mol)</b>      | <b>n° of poses</b> | <b>bestpose</b> | <b>site</b>            |
| 1                                                    | −7.0                                      | 104                | 154             | −8.10, 24.08, −22.70   |
| 2                                                    | −6.7                                      | 62                 | 288             | −2.70, −9.40, −32.60   |
| 3                                                    | −6.7                                      | 53                 | 323             | −5.44, −4.67, −7.76    |
| 4                                                    | −6.5                                      | 48                 | 342             | 15.38, 3.92, −11.34    |
| 5                                                    | −6.5                                      | 43                 | 510             | −9.30, −2.67, −50.13   |
| 6                                                    | −6.4                                      | 64                 | 180             | 16.16, 12.39, −40.58   |
| 7                                                    | −6.3                                      | 28                 | 11              | −4.15, 12.30, −49.40   |
| 8                                                    | −6.1                                      | 4                  | 483             | −18.81, −11.47, −27.38 |
| 9                                                    | −6.0                                      | 6                  | 165             | −4.34, 22.30, −36.84   |
| 10                                                   | −6.0                                      | 28                 | 121             | −23.88, 22.00, −6.52   |
| 11                                                   | −6.0                                      | 44                 | 464             | −32.08, 8.92, −14.81   |
| 12                                                   | −5.9                                      | 16                 | 43              | −24.76, 26.49, −27.65  |
| 13                                                   | −5.9                                      | 4                  | 315             | −27.01, 13.91, −31.52  |
| 14                                                   | −5.8                                      | 15                 | 559             | 10.19, −10.04, −29.74  |
| 15                                                   | −5.8                                      | 6                  | 158             | −23.93, 0.91, −36.85   |
| 16                                                   | −5.7                                      | 11                 | 126             | −2.14, 15.76, 1.01     |
| 17                                                   | −5.5                                      | 6                  | 560             | 2.85, −3.96, −53.02    |
| 18                                                   | −5.5                                      | 1                  | 127             | −3.84, 29.28, −4.52    |
| 19                                                   | −5.5                                      | 2                  | 465             | −29.80, 0.41, −21.95   |
| 20                                                   | −5.4                                      | 13                 | 218             | 20.34, 22.37, −17.77   |
| 21                                                   | −5.4                                      | 1                  | 217             | 7.07, 31.96, −31.62    |

| 22                                               | −5.4                         | 18         | 441      | −17.59, −8.36, −9.37  |
|--------------------------------------------------|------------------------------|------------|----------|-----------------------|
| 23                                               | −5.1                         | 1          | 325      | 7.97, 7.09, −5.30     |
| 24                                               | −3.0                         | 4          | 92       | 5.56, 5.16, −30.68    |
| <b>Myeloperoxidase (MPO) – molecule Cyanidin</b> |                              |            |          |                       |
| Cluster                                          | affinityenergy<br>(kcal/mol) | n° ofposes | bestpose | site                  |
| 1                                                | −7.6                         | 106        | 109      | −8.06, 23.94, −21.94  |
| 2                                                | −7.4                         | 71         | 494      | −5.71, −10.49, −30.30 |
| 3                                                | −7.3                         | 65         | 177      | 16.30, 13.35, −39.94  |
| 4                                                | −7.0                         | 52         | 342      | 15.98, 4.83, −11.76   |
| 5                                                | −7.0                         | 39         | 43       | −23.32, 23.37, −6.95  |
| 6                                                | −6.9                         | 50         | 326      | −5.22, −4.96, −8.11   |
| 7                                                | −6.9                         | 37         | 14       | −9.01, −2.20, −50.33  |
| 8                                                | −6.8                         | 18         | 64       | −19.04, 17.83, 0.25   |
| 9                                                | −6.7                         | 28         | 165      | −3.92, 12.71, −49.14  |
| 10                                               | −6.6                         | 15         | 39       | −27.51, 25.64, −26.07 |
| 11                                               | −6.4                         | 13         | 92       | 4.62, 6.16, −31.56    |
| 12                                               | −6.4                         | 7          | 314      | −23.90, 1.14, −36.86  |
| 13                                               | −6.4                         | 8          | 33       | −26.49, 12.50, −31.70 |
| 14                                               | −6.4                         | 24         | 440      | −31.84, 8.60, −14.39  |
| 15                                               | −6.0                         | 15         | 363      | 17.92, 23.86, −14.25  |
| 16                                               | −6.0                         | 8          | 552      | 10.92, −9.71, −29.87  |
| 17                                               | −6.0                         | 2          | 562      | 3.07, −4.42, −52.98   |
| 18                                               | −6.0                         | 2          | 393      | −4.02, 28.89, −5.41   |
| 19                                               | −6.0                         | 4          | 70       | −7.23, 9.86, 2.51     |
| 20                                               | −5.8                         | 6          | 442      | −17.82, −8.10, −8.90  |
| 21                                               | −5.8                         | 1          | 465      | −29.33, 0.10, −22.61  |
| 22                                               | −5.1                         | 1          | 96       | −18.18, 20.64, −36.60 |

## References

1. Ng, K.Y.; Yong, J.; Chakraborty, T.R. Estrous cycle in ob/ob and ovariectomized female mice and its relation with estrogen and leptin. *Physiol. Behav.* **2010**, *99*, 125–130, <https://doi.org/10.1016/j.physbeh.2009.11.003>.
2. Caligioni, C.S. Assessing reproductive status/stages in mice. *Curr. Protoc. Neurosci.* **2009**, *48*, A–4I, <https://doi.org/10.1002/0471142301.nsa04is48>.
3. Cora, M.C.; Kooistra, L.; Travlos, G. Vaginal Cytology of the Laboratory Rat and Mouse: Review and Criteria for the Staging of the Estrous Cycle Using Stained Vaginal Smears. *Toxicol. Pathol.* **2015**, *43*, 776–793, <https://doi.org/10.1177/0192623315570339>.
